# Supplementary material for: The asteroid 162173 Ryugu: a cometary origin
Source: Research Square preprint supplement (doi:10.21203/rs.3.rs-568248/v1), 2021-06-03
Supplement: Supplementary file 1 [file 46bfad40d84ae47a20fa328b.pdf]

# Supplementary Information for The asteroid 162173 Ryugu: a cometary origin

Hitoshi Miura, Eizo Nakamura, Tak Kunihiro

May 31, 2021

## S1 FORMULATION

Here, we describe the formulation of our model that a cometary nucleus transforms to an asteroid as a result of water ice sublimation. The outline is illustrated in Figure 1. We consider a spherically-symmetric highly-porous cometary nucleus with a two-layered structure consisting of the inner primitive region and the outer dust mantle, which are composed of water ice particles and rocky debris, respectively. Both the water ice particles and rocky debris are assumed to be spheres with diameters of  $d_i$  and  $d_r$ , respectively. The internal temperature  $T$  is assumed to be uniform and to not vary with time. The physical quantities are uniform each in the primitive region and in the dust mantle, respectively.

### S1.1 Definition of parameters

Initially, the cometary nucleus consists of only the primitive region, and its radius is  $R_0$ . As the water ice sublimates, the primitive region shrinks and the rocky debris left behind accumulates on its surface. The thickness  $\Delta$  of the dust mantle increases with the decrease in the radius  $R$  of the primitive region. When the water ice has completely sublimated,  $R$  becomes zero and  $\Delta$  gives the final radius  $R_\infty$  of the asteroid left behind. We denote the parameter in each region with a subscript ( $\alpha$ ), where  $\alpha = p$  for the primitive region and  $\alpha = m$  for the dust mantle. The macroporosity, volume fractions of water ice particles and rocky debris, and density of the region

$\alpha$  are denoted by  $\epsilon_{(\alpha)}$ ,  $\phi_{i(\alpha)}$ ,  $\phi_{r(\alpha)}$ , and  $\rho_{(\alpha)}$ , respectively. The relationship between the macroporosity and volume fractions is given by

$$\epsilon_{(\alpha)} = 1 - (\phi_{i(\alpha)} + \phi_{r(\alpha)}). \quad (\text{S1})$$

We find  $\phi_{i(m)} = 0$  because there is no water ice in the dust mantle. The density  $\rho_{(\alpha)}$  of each region is given by

$$\rho_{(\alpha)} = \varrho_r \phi_{r(\alpha)} + \varrho_i \phi_{i(\alpha)}, \quad (\text{S2})$$

where  $\varrho_i$  and  $\varrho_r$  are the material densities of the water ice particles and rocky debris, respectively. The mass fraction  $f$  of water ice in the primitive region is given by

$$f = \frac{\varrho_i \phi_{i(p)}}{\varrho_r \phi_{r(p)} + \varrho_i \phi_{i(p)}} = \frac{\varrho_i \phi_{i(p)}}{\rho_{(p)}}. \quad (\text{S3})$$

The physical quantities defined above are not independent of each other. We choose  $\epsilon_{(p)}$ ,  $\epsilon_{(m)}$ , and  $f$  as independent input parameters that are more relevant to observation. The other quantities are determined from these independent parameters as follows. From Eq. (S3), we obtain  $\frac{f}{1-f} = \frac{\varrho_i \phi_{i(p)}}{\varrho_r \phi_{r(p)}}$ . Solving this equation and Eq. (S1) for  $\phi_{r(p)}$  and  $\phi_{i(p)}$ , respectively, we obtain

$$\phi_{r(p)} = \frac{1 - \epsilon_{(p)}}{1 + \frac{\varrho_r}{\varrho_i} \frac{f}{1-f}}, \quad \phi_{i(p)} = \frac{1 - \epsilon_{(p)}}{\frac{\varrho_i}{\varrho_r} \frac{1-f}{f} + 1} \quad (\text{S4})$$

for the primitive region, and

$$\phi_{r(m)} = 1 - \epsilon_{(m)} \quad (\text{S5})$$

for the dust mantle. The ratio  $p = \rho_{(m)}/\rho_{(p)}$  of densities between the primitive region and the dust mantle is obtained as

$$p = \frac{\varrho_r \phi_{r(m)}}{\varrho_r \phi_{r(p)} + \varrho_i \phi_{i(p)}} = \frac{1 - \epsilon_{(m)}}{1 - \epsilon_{(p)}} \left( 1 + \frac{\varrho_r - \varrho_i}{\varrho_i} f \right). \quad (\text{S6})$$

Supplementary Table 1 shows the default values of input parameters. Unless otherwise noted, the values in this table are used in calculations.

Supplementary Table 1: Default values of input parameters used in calculations.

| Quantity                                                                          | Notation         | Value                   |
|-----------------------------------------------------------------------------------|------------------|-------------------------|
| <i>Independent parameters:</i>                                                    |                  |                         |
| Initial radius of cometary nucleus                                                | $R_0$            | 3 km                    |
| Temperature of cometary nucleus                                                   | $T$              | 200 K                   |
| Diameter of water ice particles                                                   | $d_i$            | 1 $\mu\text{m}$         |
| Diameter of rocky debris                                                          | $d_r$            | 1 cm                    |
| Initial mass fraction of water ice                                                | $f$              | 0.99                    |
| Macroporosity in primitive region                                                 | $\epsilon_{(p)}$ | 0.6                     |
| Macroporosity in dust mantle                                                      | $\epsilon_{(m)}$ | 0.6                     |
| <i>Dependent parameters determined by <math>f, \epsilon_1, \epsilon_2</math>:</i> |                  |                         |
| Volume fraction of rocky debris in primitive region                               | $\phi_{r(p)}$    | 0.00134                 |
| Volume fraction of water ice particles in primitive region                        | $\phi_{i(p)}$    | 0.39866                 |
| Volume fraction of rocky debris in dust mantle                                    | $\phi_{r(m)}$    | 0.4                     |
| Density of primitive region                                                       | $\rho_{(p)}$     | 0.403 g/cm <sup>3</sup> |
| Density of dust mantle                                                            | $\rho_{(m)}$     | 1.200 g/cm <sup>3</sup> |
| Ratio in densities of dust mantle to primitive region                             | $p$              | 2.98                    |
| <i>Material constants:</i>                                                        |                  |                         |
| Material density of water ice particles                                           | $\varrho_i$      | 1.0 g/cm <sup>3</sup>   |
| Material density of rocky debris                                                  | $\varrho_r$      | 3.0 g/cm <sup>3</sup>   |

## S1.2 Distribution of vapor

### S1.2.1 Vapor flow in pores

The pores inside the cometary nucleus are filled with water vapor generated by the sublimation of water ice particles. The production rate  $q_{(p)}$  of the water vapor per unit volume of the primitive region is given by [22]

$$q_{(p)} = \phi_{i(p)} S \left( \frac{m}{2\pi k_B T} \right)^{1/2} (P_e - P), \quad (S7)$$

where  $S = 6/d_i$  is the surface-to-volume ratio of water ice particles,  $P_e$  is the equilibrium vapor pressure of water ice,  $P$  is the pressure of water vapor filling the pores,  $k_B$  is the Boltzmann constant, and  $m$  is the mass of a water molecule. The equilibrium vapor pressure is given by [22]

$$P_e = 3.56 \times 10^{12} \exp \left( -\frac{6141.667}{T} \right) \text{ Pa}. \quad (S8)$$

On the other hand, the dust mantle does not contain water ice particles, so the production rate  $q_{(m)}$  is naturally zero.

The flow of water vapor in the porous cometary nucleus is driven by the pressure gradient. The cometary nucleus is cold, the equilibrium vapor pressure is low, and the water vapor filling the pores is dilute. The mean free path is a few centimeters at 200 K, which is much longer than the typical size of pores [22]. Therefore, the flow can be regarded as a free molecular flow. Assuming that the region  $\alpha$  is randomly packed with spherical particles of diameter  $d_{(\alpha)}$ , the flux  $\mathbf{J}_{(\alpha)}$  of water vapor is given by [22]

$$\mathbf{J}_{(\alpha)} = -\frac{16}{3} \left( \frac{m}{2\pi k_B} \right)^{1/2} \frac{\epsilon_{(\alpha)}^{3/2}}{(1 - \epsilon_{(\alpha)})^{1/3}} d_{(\alpha)} \nabla \left( \frac{P}{\sqrt{T}} \right). \quad (S9)$$

The primitive region contains both of water ice particles and rocky debris. Since the flux is controlled by smaller particles, the particle diameter  $d_{(p)}$  in the primitive region can be assumed to be equal to the diameter  $d_i$  of water ice particles. On the other hand, since only rocky debris exists in the dust mantle, the particle diameter  $d_{(m)}$  is equal to the diameter  $d_r$  of rocky debris. Although the diameter of the rocky debris assumed in this study is about the same as the mean free path of water vapor, we use the equation for a free molecular flow, because it makes the model simpler.

Let us assume that the vapor flow inside the cometary nucleus reaches steady state on the evolution timescale of the cometary nucleus. The steady flow satisfies the following continuity equation in each region:

$$\nabla \cdot \mathbf{J}_{(\alpha)} = q_{(\alpha)}. \quad (\text{S10})$$

Substituting Eqs. (S7) and (S9) into Eq. (S10) yields an equation for the pressure distribution  $P(r)$ . When the temperature  $T$  is uniform, the equation becomes a Poisson equation in the primitive region and a Laplace equation in the dust mantle, respectively. These equations can be solved analytically under appropriate boundary conditions.

### S1.2.2 Boundary condition

We denote the pressure distributions in the primitive region and in the dust mantle as  $P_{(\text{p})}(r)$  and  $P_{(\text{m})}(r)$ , respectively. These two distributions are connected so as to satisfy the following two boundary conditions at  $r = R$  (contact boundary). The first boundary condition is that the pressure is continuous; namely,  $P_{(\text{p})}(R) = P_{(\text{m})}(R)$  (boundary condition i). The second boundary condition is that the flux is continuous; namely,  $J_{(\text{p})}(R) = J_{(\text{m})}(R)$  (boundary condition ii). In addition, we consider a zero-flux condition at the center of the cometary nucleus ( $J_{(\text{p})}(0) = 0$ , boundary condition iii) and zero pressure at the mantle surface ( $P_{(\text{m})}(R + \Delta) = 0$ , boundary condition iv).

Using Eq. (S9), the boundary condition (ii) is rewritten as

$$\frac{dP_{(\text{p})}}{dr} = \chi \frac{dP_{(\text{m})}}{dr}, \quad (\text{at } r = R) \quad (\text{S11})$$

where  $\chi$  is a dimensionless quantity defined by

$$\chi \equiv \left( \frac{\epsilon_{(\text{m})}}{\epsilon_{(\text{p})}} \right)^{3/2} \left( \frac{1 - \epsilon_{(\text{m})}}{1 - \epsilon_{(\text{p})}} \right)^{-1/3} \frac{d_{(\text{m})}}{d_{(\text{p})}}. \quad (\text{S12})$$

In this paper, we assume  $d_{(\text{p})} \ll d_{(\text{m})}$ , so  $\chi \gg 1$  is valid unless the macroporosities of the primitive region and dust mantle are very different. Therefore, at the contact boundary, the magnitude of the pressure gradient in the primitive region is much larger than that in the dust mantle.

### S1.2.3 Analytic solution

Solving equations for  $P_{(p)}(r)$  and  $P_{(m)}(r)$  together with the boundary conditions (i)-(iv), we obtain the analytical solution as follows:

$$P_{(p)}(r) = \left[ 1 - g_{R,\Delta} \frac{\sinh(r/h)}{\sinh(R/h)} \frac{R}{r} \right] P_e, \quad (\text{for } 0 \leq r \leq R) \quad (\text{S13})$$

$$P_{(m)}(r) = (1 - g_{R,\Delta}) \frac{R}{\Delta} \left( \frac{R + \Delta}{r} - 1 \right) P_e, \quad (\text{for } R < r \leq R + \Delta) \quad (\text{S14})$$

where  $g_{R,\Delta}$  and  $h$  are constants defined by

$$g_{R,\Delta} \equiv \frac{\chi(1 + \Delta/R) \tanh(R/h)}{(\Delta/h) + [\chi + (\chi - 1)\Delta/R] \tanh(R/h)}, \quad (\text{S15})$$

$$h \equiv \frac{2\sqrt{2}}{3} \frac{\epsilon_{(p)}^{3/4}}{(1 - \epsilon_{(p)})^{1/6}} \frac{d_{(p)}}{\phi_{i(p)}^{1/2}}. \quad (\text{S16})$$

Substituting the values listed in Supplementary Table 1, we obtain  $h = 1.61 \mu\text{m}$ .

Supplementary Figure 1 shows the analytic solutions of  $P_{(p)}(r)$  and  $P_{(m)}(r)$ . Panel (a) shows  $P_{(p)}(r)$  and  $P_{(m)}(r)$  near the contact boundary. The horizontal axis is the distance from the contact boundary. Here, we use  $R = 1 \text{ km}$  and  $\Delta = 1 \text{ cm}$ . Throughout almost the entire area of the primitive region,  $P_{(p)}(r)$  is equal to  $P_e$ , indicating that a solid-vapor equilibrium has been established. However,  $P_{(p)}(r)$  decreases rapidly in a very narrow region near the contact boundary and is connected to the pressure  $P_{(m)}(R)$  in the dust mantle. In the dust mantle,  $P_{(m)}(r)$  decreases slowly toward the outside and becomes zero at the surface. Panels (b) and (c) respectively show the dependences of  $P_{(p)}(r)$  and  $P_{(m)}(r)$  on  $\Delta$ . In panel (b), the horizontal axis is magnified around the contact boundary. In panel (c), the horizontal axis is normalized by  $\Delta$ . The thicker the dust mantle, the closer the water vapor pressure at the contact boundary is to the equilibrium vapor pressure. This trend can be understood by considering that the dust mantle acts as a lid to prevent the leakage of the water vapor. However, for any mantle thicknesses, the pressure is almost equal to  $P_e$  as one dives deeper than a few times  $h$  from the contact boundary into the primitive region. This suggests that the water ice sublimates only at the very vicinity of the contact boundary. Therefore, we refer to the contact boundary as a sublimation front in the current study.

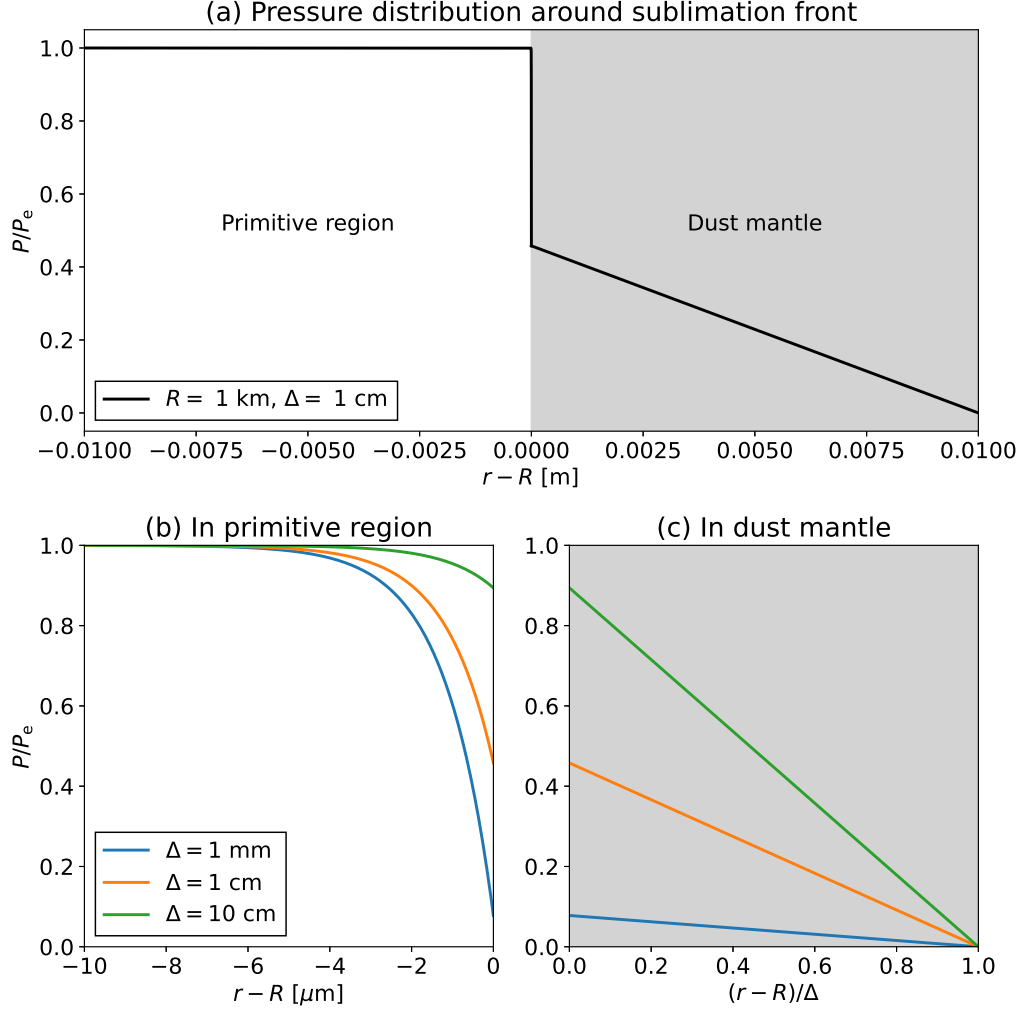

Supplementary Figure 1: Analytic solution of pressure distribution  $P(r)$  of water vapor in cometary nucleus. Panel (a) shows  $P(r)$  near the contact boundary between the primitive region and the dust mantle in the case with  $R = 1$  km and  $\Delta = 1$  cm. Panels (b) and (c) show the dependence on  $\Delta$ . Panel (b) is a magnified view of  $P(r)$  in the primitive region, and panel (c) is in the dust mantle. The horizontal axis indicates the distance from the contact boundary, where negative values indicate the primitive region side and positive values indicate the dust mantle side. Note that the horizontal axis in panel (c) is normalized by  $\Delta$ . The region corresponding to the dust mantle is filled in gray. The pressure in the vertical axis is normalized by the equilibrium vapor pressure  $P_e$ .

### 119 S1.3 Shrinkage of nucleus and dust mantle formation

120 As can be seen in Supplementary Figure 1,  $P_{(p)}(r)$  is not uniform in the very  
 121 neighborhood of the sublimation front. The fact that the water vapor pres-  
 122 sure varies from place-to-place means that the sublimation rate of water ice  
 123 varies from place to place (see Eq. S7). In other words, water ice particles  
 124 closer to the sublimation front sublime faster, so physical quantities such  
 125 as the volume fraction of water ice particles cannot be strictly uniform. How-  
 126 ever, the width of such inhomogeneous region is at most a few times larger  
 127 than  $h$ , which is much smaller than the size of the entire cometary nucleus.  
 128 Therefore, we can assume that the physical quantities in the primitive region  
 129 are uniform and that water ice sublimates only from the surface of the prim-  
 130 itive region. In this case, the time variation of the radius  $R$  of the primitive  
 131 region is given by

$$\frac{dR}{dt} = -\frac{J_{(p,sf)}}{\varrho_i \phi_{i(p)}}, \quad (S17)$$

132 where  $J_{(p,sf)}$  is the value of  $J_{(p)}$  at the sublimation front and is given by

$$J_{(p,sf)} = 4 \left( \frac{m}{\pi k_B T} \right)^{1/2} \frac{\epsilon_{(p)}^{3/4}}{(1 - \epsilon_{(p)})^{1/6}} g_{R,\Delta} \left[ \frac{1}{\tanh(R/h)} - \frac{1}{R/h} \right] P_e, \quad (S18)$$

133 where we used Eq. (S13).

134 Rocky debris contained outside the primitive region accumulates on the  
 135 surface of the primitive region and forms the dust mantle. From the mass  
 136 conservation for the rocky debris, we obtain the following relationship be-  
 137 tween  $R$  and  $\Delta$  [15]:

$$\frac{4\pi}{3} (R_0^3 - R^3) (1 - f) = \frac{4\pi}{3} [(R + \Delta)^3 - R^3] p. \quad (S19)$$

138 Solving Eq. (S19) for  $\Delta$ , we obtain the normalized mantle thickness  $k =$   
 139  $\Delta/R_0$  as follows:

$$k = \left[ x^3 + \frac{1-f}{p} (1 - x^3) \right]^{1/3} - x, \quad (S20)$$

140 where  $x = R/R_0$ . The value of  $k$  at  $x = 0$ ,  $k_\infty = (\frac{1-f}{p})^{1/3}$ , gives the  
 141 normalized final radius  $R_\infty/R_0$  when the cometary nucleus has transformed  
 142 to an asteroid.



## 143 S1.4 Spin-up

144 Since assuming the spherical symmetry, the water vapor does not exert any  
 145 reaction torque on the cometary nucleus when ejected. Therefore, the nucleus  
 146 never starts spinning if not rotating initially. However, if the nucleus is  
 147 initially rotating, the moment of inertia will change as it contracts, and its  
 148 spin rate may also change. Watanabe [15] formulated the spin-up by taking  
 149 into account the angular momentum loss due to the ice sublimation and the  
 150 decrease in the moment of inertia due to the contraction of the cometary  
 151 nucleus. However, he assumed the case where the cometary nucleus shrinks  
 152 only slightly, so his model cannot be directly applied to the drastic change  
 153 where the cometary nucleus loses almost all of water ice. Here, we modified  
 154 the Watanabe's formulation to apply to the case where the radius of the  
 155 cometary nucleus changes significantly.

156 The angular momentum of the cometary nucleus is  $L = I\omega$ , where  $I$  is  
 157 the moment of inertia of the cometary nucleus and  $\omega$  is its angular velocity.  
 158 Differentiating  $L$  by  $R$ , we obtain

$$\frac{1}{\omega} \frac{d\omega}{dR} = \frac{1}{I\omega} \frac{dL}{dR} - \frac{1}{I} \frac{dI}{dR}. \quad (\text{S21})$$

159 The angular momentum is reduced by the amount associated with the water  
 160 vapor leaking from the mantle surface. Therefore, the time variation of  $L$  is  
 161 given by<sup>1</sup>

$$\frac{dL}{dt} = -\frac{8\pi}{3}(R + \Delta)^4 J_{(\text{m,s})}\omega, \quad (\text{S22})$$

162 where  $J_{(\text{m,s})}$  is the value of  $J_{(\text{m})}$  at the mantle surface ( $r = R + \Delta$ ). From  
 163 Eq. (S22), we obtain

$$\frac{dL}{dR} = \frac{dL}{dt} \frac{dt}{dR} = \frac{8\pi}{3} f \rho_{(\text{p})} (R + \Delta)^2 R^2 \omega, \quad (\text{S23})$$

164 where we used the continuity of the water vapor flowing in the pores given by  
 165  $R^2 J_{(\text{p,sf})} = (R + \Delta)^2 J_{(\text{m,s})}$ . The moment of inertia  $I$  of the cometary nucleus  
 166 including the dust mantle is given by

$$I = \frac{8\pi}{15} \left[ \rho_{(\text{m})} (R + \Delta)^5 - (\rho_{(\text{m})} - \rho_{(\text{p})}) R^5 \right]. \quad (\text{S24})$$

---

<sup>1</sup>We used the fact that the moment of inertia of a thin spherical shell with the mass  $M$  and radius  $R$  is given by  $\frac{2}{3}MR^2$ .

167 Substituting Eqs. (S23) and (S24) into Eq. (S21), and integrating for  $R$   
 168 from  $R_0$  to  $R$ , we obtain the angular velocity  $\omega(x)$  when the radius of the  
 169 primitive region becomes  $R = xR_0$ , as the ratio to the initial value  $\omega_0$ , as  
 170 follows:

$$\frac{\omega(x)}{\omega_0} = \frac{\exp[D(x)]}{p(x+k)^5 - x^5(p-1)}, \quad (\text{S25})$$

171 where  $D(x)$  is a function defined by

$$D(x) \equiv \int_1^x \frac{5fx^2(x+k)^2}{p(x+k)^5 - x^5(p-1)} dx. \quad (\text{S26})$$

172 When  $x = 0$ , the equation (S25) gives the final spin-up rate after the water  
 173 ice sublimates completely. This final spin-up rate depends only on the values  
 174 of  $f$  and  $p$ , and not on the process in the middle.

175 Eq. (S25) has the same form as the Watanabe's model, but the definition  
 176 of the function  $D(x)$  given by Eq. (S26) differs in two respects. The first  
 177 respect is the difference in the relationship between  $x$  and  $k$  (see Eq. S20).  
 178 The Watanabe's model uses the approximation  $k = (1-x)(1-f)/p$ , which is  
 179 valid only when the contraction of the cometary nucleus is sufficiently small  
 180 ( $x \simeq 1$  and  $k \ll 1$ ). The second respect is that in the Watanabe's model the  
 181 numerator of the integrand was not  $5fx^2(x+k)^2$  but  $5fx^4$ ; namely,  $(k/x)^2$   
 182 was ignored as sufficiently small for 1. In the Watanabe's model, the angular  
 183 momentum is assumed to be carried away when the water vapor is released  
 184 outside the primitive region. However, the water vapor ejected from the  
 185 surface of the primitive region passes through the dust mantle before being  
 186 ejected from the cometary nucleus, and slows down its rotation. The Watan-  
 187 abe's model is a good approximation when the contraction of the cometary  
 188 nucleus is sufficiently small, but it cannot be applied to the situation where  
 189 almost all the water ice sublimates, as in this study.

## 190 S1.5 Numerical scheme

191 Eq. (S17) was integrated numerically using the fourth-order accurate Runge–  
 192 Kutta method. The time step  $\Delta t$  is variable and is taken to be smaller as  
 193 the rate of change in  $R$  is larger. Specifically,  $\Delta t$  was given to satisfy the  
 194 following:

$$\frac{R_0/N}{\Delta t} = \left| \frac{dR}{dt} \right|, \quad (\text{S27})$$

195 where  $N$  is an integer and we set  $N = 10^3$  in this study. If  $R$  becomes  
 196 negative, we calculate the sublimation time at which  $R$  becomes just zero by  
 197 linear interpolation with the value of  $R$  at the previous time step.

198 The increase in the angular velocity of rotation with the shrinking of  
 199 the cometary nucleus was calculated using Eq. (S25). The integration  
 200 of  $D(x)$  given by Eq. (S26) was performed numerically using a package  
 201 `integrate.quad()` in the Python library `SciPy`.

## 202 **S1.6 Parameter dependence**

203 The time it takes for the water ice to sublime completely is called the  
 204 sublimation time. The parameter dependence is revealed by normalizing Eq.  
 205 (S17). Substituting Eq. (S18) into Eq. (S17), we obtain

$$\frac{dx}{d(t/\tau_{\text{sub}})} \simeq -\left(\frac{1}{k} + \frac{1}{x}\right). \quad (\text{S28})$$

206 Here, for  $J_{(\text{p},\text{sf})}$ , we approximated  $\tanh(R/h) \rightarrow 1$  because  $R \gg h$ , and ig-  
 207 nored the term  $h/R$  as sufficiently small for 1. For  $g_{R,\Delta}$ , we used  $\chi \ll 1$ , and  
 208 also approximated  $\tanh(R/h) \rightarrow 1$  and ignored the term  $\chi/(\Delta/h)$  as suffi-  
 209 ciently small. This approximation is valid because  $\chi/(\Delta/h) \sim (d_{(\text{m})}/d_{(\text{p})})/(\Delta/h) \sim$   
 210  $d_{(\text{m})}/\Delta$ , and the dust mantle is much thicker than the diameter of the rocky  
 211 debris except in the very early stage of cometary nucleus evolution. From Eq.  
 212 (S28), we can see that the time variation of  $R$  can be scaled by a timescale  
 213  $\tau_{\text{sub}}$ , which is defined by

$$\tau_{\text{sub}} \equiv \frac{3\sqrt{2}}{16} \frac{(1 - \epsilon_{(\text{m})})^{1/3}}{\epsilon_{(\text{m})}^{3/2}} \left(\frac{\pi k_{\text{B}} T}{m}\right)^{1/2} \frac{\varrho_{\text{i}} \phi_{\text{i}(\text{p})} R_0^2}{d_{(\text{m})} P_{\text{e}}}. \quad (\text{S29})$$

214 This means that the sublimation time is proportional to  $R_0^2$ , and inversely  
 215 proportional to  $d_{(\text{m})}$  and  $P_{\text{e}}(T)/\sqrt{T}$ .
